# Supplementary material for: Photonic Nanojet‐Mediated Optogenetics
Source: PubMed Central journal article supplement (PMC9036029; doi:10.1002/advs.202104140), 2022-02-20
Supplement: ADVS-9-2104140-s001.pdf [file ADVS-9-2104140-s001.pdf]

## Supplementary Information

### Supplementary Figure 1

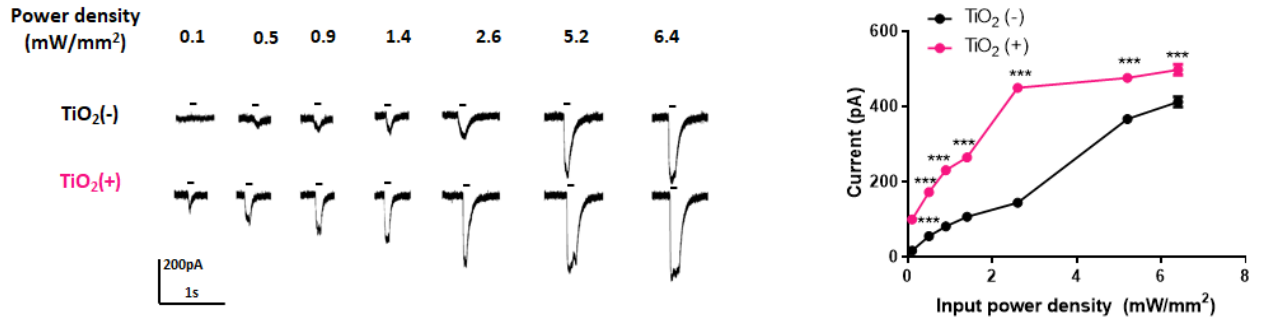

**Supplementary Figure 1. Effect of TiO<sub>2</sub> in the whole-cell currents induced by blue light pulse with different power density.** (A) Whole-cell current recording in ChR2 transfected 293T cells induced by blue light pulse with different power density with (TiO<sub>2</sub>(+)) or without (TiO<sub>2</sub>(-)). (B) The curve between input power density and inward currents induced by light with TiO<sub>2</sub> or without TiO<sub>2</sub> in 293T cells, n=9, \*\*\*:p<0.001, unpaired two-tailed t test.
